# Supplementary material for: A human Tau expressing zebrafish model of progressive supranuclear palsy identifies Brd4 as a regulator of microglial synaptic elimination
Source: PubMed Central journal article supplement (PMC11410960; doi:10.1038/s41467-024-52173-0), 2024-09-18
Supplement: 41467_2024_52173_MOESM3_ESM.pdf [file 41467_2024_52173_MOESM3_ESM.pdf]

## **Description of Additional Supplementary Files**

### **File Name: Supplementary Movie 1**

**Description:** Example infrared videomicrography recordings of optokinetic responses in Ctrl and Tau zebrafish at 5 days post-fertilization, shown at 3 x actual speed for clarity. The video is a collage of two separate recordings for Ctrl and Tau zebrafish, made in response to identical stimuli; a linear rendering of the stimulus is shown at the top of the image for comparison. Quantitative analysis in a statistically robust sample of zebrafish is shown in Figure 6.
